# Supplementary material for: PDMS-based turbulent microfluidic mixer
Source: Royal Society of Chemistry journal article supplement (doi:10.1039/c5lc00070j), 2015-01-01
Supplement: c5lc00070j4.pdf [file c5lc00070j4.pdf]

## Electronic Supplementary Information (ESI)

### PDMS-based Turbulent Microfluidic Mixer

Jae Bem You,<sup>a,†</sup> Kyowon Kang,<sup>b,e,†</sup> Hongkeun Park,<sup>a</sup> Thanh Tinh Tran,<sup>c</sup> Wook Ryol Hwang,<sup>c,\*</sup> Ju Min Kim,<sup>b,e,\*</sup> and  
Sung Gap Im<sup>a,d,\*</sup>

- <sup>a</sup> Department of Chemical and Biomolecular Engineering, Korea Advanced Institute of Science and Technology (KAIST), Daejeon, Republic of Korea 305-701
- <sup>b</sup> Department of Chemical Engineering, Ajou University, Suwon, Republic of Korea 443-749
- <sup>c</sup> School of Mechanical Engineering, ReCAPT, Gyeongsang University, Jinju, Republic of Korea 660-701
- <sup>d</sup> KAIST Institute (KI) for NanoCentury, Korea Advanced Institute of Science and Technology (KAIST), Daejeon, Republic of Korea 305-701
- <sup>e</sup> Department of Energy Systems Research, Ajou University, Suwon 443-749, Republic of Korea

**Figure S1. Analysis locations**

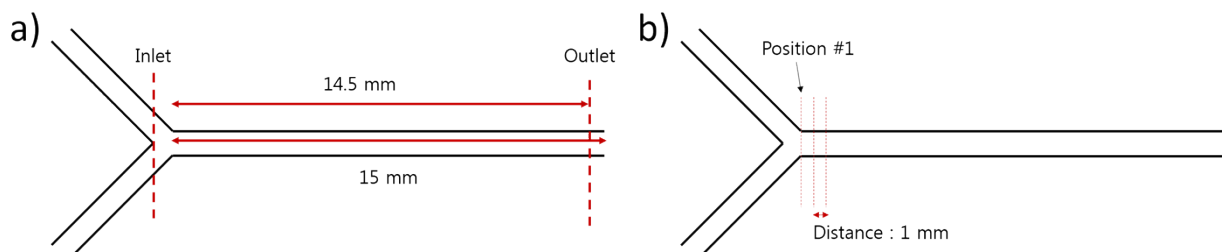

Details of locations at which analyses were performed: (a) inlet and outlet intensities and (b) coefficients of variation.

**Figure S2. Inlet and Outlet images and concentration profile for 6, 8 and 14 ml/min**

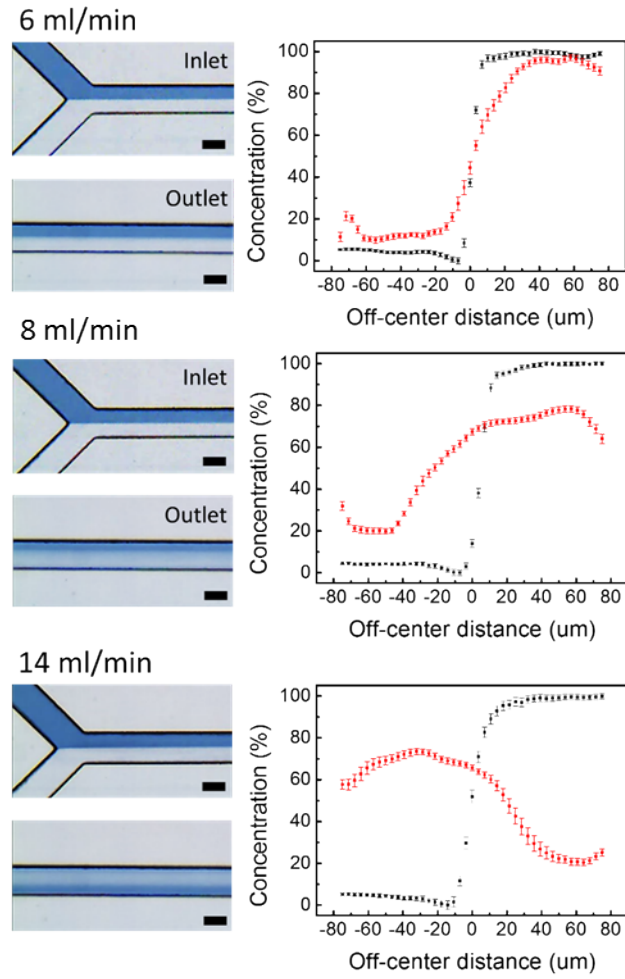

### S3. Details of computational fluid dynamics

The Reynolds-averaged Navier–Stokes equations for mass and momentum conservation are as follows:

$$\frac{\partial u_i}{\partial x_i} = 0,$$

$$\rho \frac{\partial u_i}{\partial t} + \rho u_j \frac{\partial u_i}{\partial x_j} = -\frac{\partial p}{\partial x_i} + \frac{\partial}{\partial x_j} \left[ \mu \left( 2D_{ij} - \frac{2\partial u_k}{\partial x_k} \delta_{ij} \right) - 2\mu_t D_{ij} - \frac{2}{3} \rho k \delta_{ij} \right].$$

The symbols  $\rho, u_i, D_{ij} = \frac{1}{2} \left( \frac{\partial u_i}{\partial x_j} + \frac{\partial u_j}{\partial x_i} \right), p, \mu, \mu_t$ , and  $k$  are the density, velocity, rate-of-deformation tensor, hydrostatic pressure, dynamic viscosity, turbulent viscosity, and turbulent kinetic energy, respectively.

### The $k - \omega - SST$ turbulent model

The equations for the kinetic energy  $k$  and turbulence energy dissipation rate  $\omega$  are as follows:

$$\rho \frac{\partial k}{\partial t} + \rho u_j \frac{\partial k}{\partial x_j} = \tau_{ij} \frac{\partial u_i}{\partial x_j} - \beta^* \rho \omega k + \frac{\partial}{\partial x_j} \left[ (\mu + \sigma_k \mu_t) \frac{\partial k}{\partial x_j} \right],$$

$$\rho \frac{\partial \omega}{\partial t} + \rho u_j \frac{\partial \omega}{\partial x_j} = \frac{\gamma}{\nu_t} \tau_{ij} \frac{\partial u_i}{\partial x_j} - \beta \rho \omega^2 + \frac{\partial}{\partial x_j} \left[ (\mu + \sigma_\omega \mu_t) \frac{\partial \omega}{\partial x_j} \right] + 2(1 - F_1) \rho \sigma_{\omega 2} \omega \frac{\partial k}{\partial x_j} \frac{\partial \omega}{\partial x_j}.$$

The constants  $\sigma_k, \gamma$ , and  $\sigma_\omega$ , denoted by  $\phi$  collectively, are computed from the weight-average constants  $\sigma_{k1}, \gamma_1$ , and  $\sigma_{\omega 1}$ , denoted by  $\phi_1$ , of the shear-stress transport (SST) model, and the constants  $\sigma_{k2}, \gamma_2$ , and  $\sigma_{\omega 2}, \phi_2$ , of the  $k - \varepsilon$  model:  $\phi = F_1 \phi_1 + (1 - F_1) \phi_2$ , where the blending function  $F_1$  is

$$F_1 = \tanh \left\{ \left[ \min \left[ \max \left( \frac{\sqrt{k}}{0.09 \omega y}; \frac{500 \nu}{y^2 \omega} \right); \frac{4 \rho \sigma_{\omega 2} k}{CD_{k\omega} y^2} \right] \right]^4 \right\} \quad \text{with} \quad CD_{k\omega} = \max \left( 2 \rho \sigma_{\omega 2} \frac{1}{\omega} \frac{\partial k}{\partial x_j} \frac{\partial \omega}{\partial x_j}; 10^{-20} \right).$$

The constants are  $\sigma_{k1} = 0.85, \sigma_{\omega 1} = 0.5, \beta_1 = 0.075, a_1 = 0.31, \beta^* = 0.09, \kappa = 0.41$ , and  $\gamma_1 = \beta_1 / \beta^* - \sigma_{\omega 1} \kappa^2 / \sqrt{\beta^*}$  for the SST model, and  $\sigma_{k2} = 1.0, \sigma_{\omega 2} = 0.856, \beta_2 = 0.0828, \beta^* = 0.09, \kappa = 0.41$ , and  $\gamma_2 = \beta_2 / \beta^* - \sigma_{\omega 2} \kappa^2 / \sqrt{\beta^*}$  for the  $k - \varepsilon$  model.

The following definitions are used:

$$\tau_{ij} = \mu_t \left( \frac{\partial u_i}{\partial x_j} + \frac{\partial u_j}{\partial x_i} - \frac{2 \partial u_k}{3 \partial x_k} \delta_{ij} \right) - \frac{2}{3} \rho k \delta_{ij}$$

$$v_t = \frac{a_1 k}{\max(a_1 \omega; SF_2)} F_2 = \tanh \left\{ \left[ \max \left( 2 \frac{\sqrt{k}}{0.09 \omega y}; \frac{500 \nu}{y^2 \omega} \right) \right]^2 \right\}; S \text{ is the second invariant of the rate-of-deformation tensor } D.$$

### Convection–diffusion equation for dye transport:

The concentration of a dye, denoted by  $c$ , is described by the following convection–diffusion equation:

$$\frac{\partial c}{\partial t} + u_i \frac{\partial c}{\partial x_i} = \frac{\partial}{\partial x_i} \left[ \left( D_m + \frac{\nu_t}{Sc_t} \right) \frac{\partial c}{\partial x_i} \right]$$

where  $D_m$ ,  $\nu_t$ , and  $Sc_t$  are the mass thermal diffusion coefficient, turbulent kinematic viscosity, and turbulent Schmidt number, respectively.
